# Supplementary material for: Dietary Inflammatory Index and Biomarkers of Lipoprotein Metabolism, Inflammation and Glucose Homeostasis in Adults
Source: PubMed Central journal article supplement (PMC6115860; doi:10.3390/nu10081033), 2018-08-08

**Supplementary Figure 1.** Flow chart outlining the subject selection for the current analysis of the Mitchelstown cohort

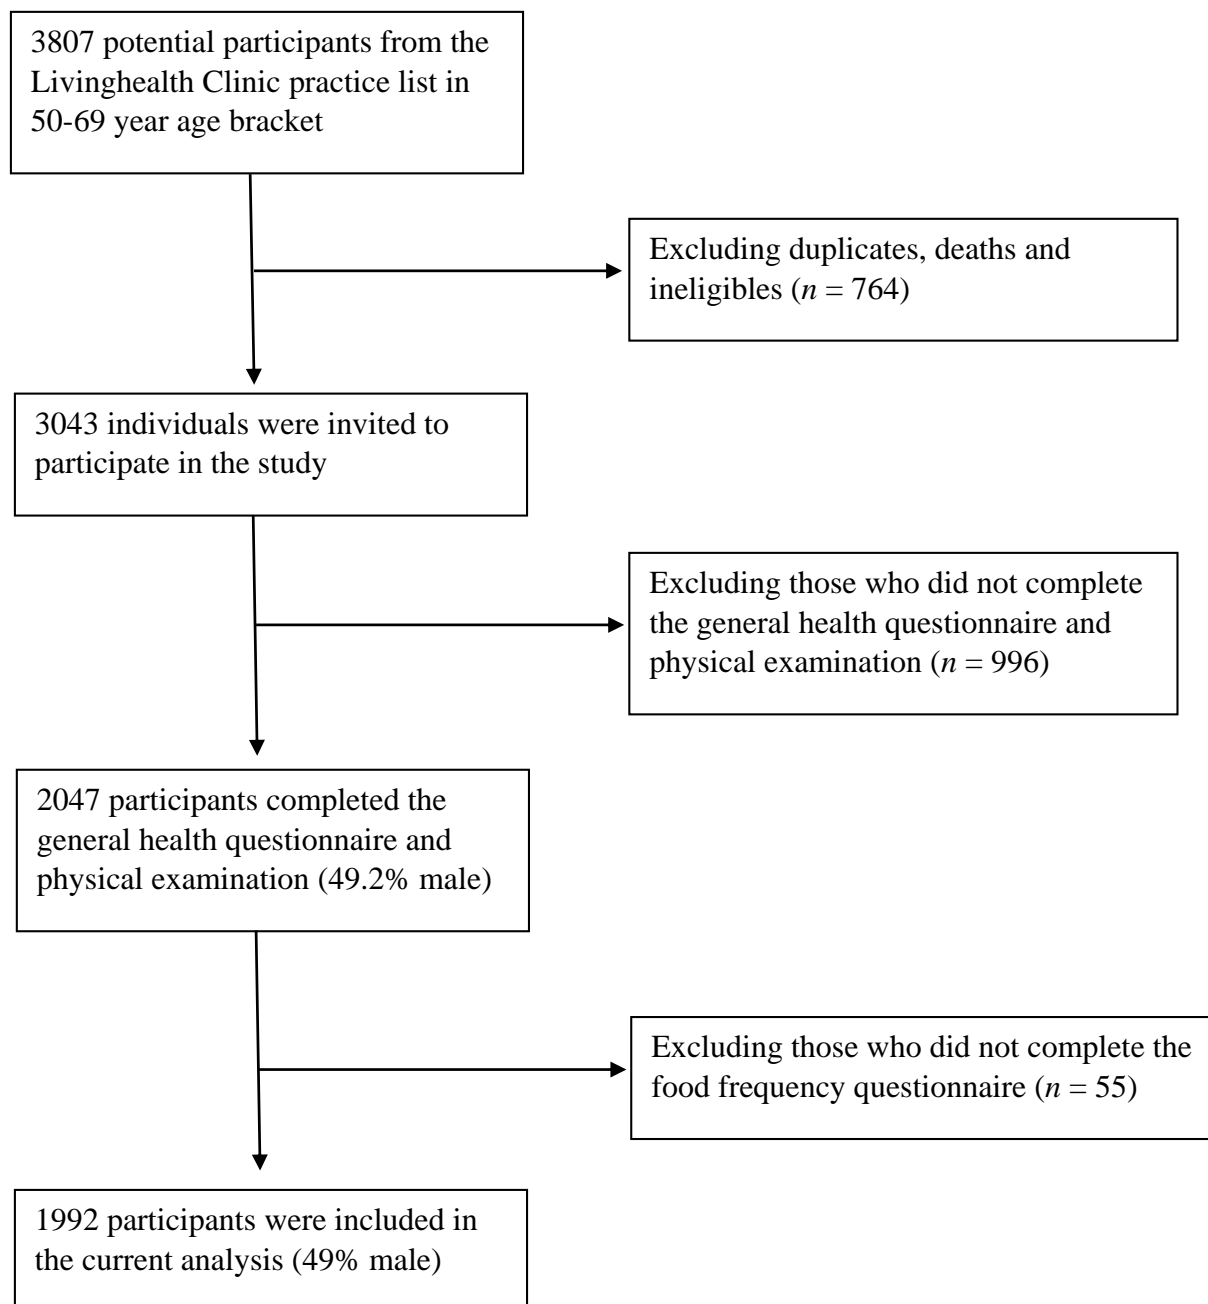

Supplement: nutrients-10-01033-s001.pdf [file nutrients-10-01033-s001.pdf]
